# Supplementary material for: In silico, in vitro, X-ray crystallography, and integrated strategies for discovering spermidine synthase inhibitors for Chagas disease
Source: PubMed Central journal article supplement (PMC5532286; doi:10.1038/s41598-017-06411-9), 2017-07-27
Supplement: 41598_2017_6411_MOESM1_ESM.pdf [file 41598_2017_6411_MOESM1_ESM.pdf]

## Supplementary Materials for

*In silico, in vitro, X-ray crystallography, and integrated strategies for discovering spermidine synthase inhibitors for Chagas disease*

### Authors

Ryunosuke Yoshino<sup>3,4,6</sup>, Nobuaki Yasuo<sup>2,6</sup>, Yohsuke Hagiwara<sup>2,5</sup>, Takashi Ishida<sup>1,2,6</sup>, Daniel Ken Inaoka<sup>7,8</sup>, Yasushi Amano<sup>5</sup>, Yukihiro Tateishi<sup>5</sup>, Kazuki Ohno<sup>2,5,9</sup>, Ichiji Namatame<sup>5</sup>, Tatsuya Niimi<sup>5</sup>, Masaya Orita<sup>5</sup>, Kiyoshi Kita<sup>7,8</sup>, Yutaka Akiyama<sup>1,2,6</sup>, and Masakazu Sekijima<sup>1,2,3,6\*</sup>

### Affiliations

<sup>1</sup>Advanced Drug Discovery Unit, Institute of Innovative Research, Tokyo Institute of Technology, 4259-J3-23, Nagatsuta-cho, Midori-ku, Yokohama, 226-8502, JAPAN

<sup>2</sup>Education Academy of Computational Life Sciences (ACLS), Tokyo Institute of Technology, Yokohama 226-8501 Japan

<sup>3</sup>Global Scientific Information and Computing Center, Tokyo Institute of Technology, 2-12-1 Ookayama, Meguro-ku, Tokyo 152-8550 Japan

<sup>4</sup>Graduate School of Agricultural and Life Sciences, The University of Tokyo, Bunkyo-ku, Tokyo 113-8657 Japan

<sup>5</sup>Medicinal Chemistry Research Labs, Drug Discovery Research, Astellas Pharma Inc, 21 Miyukigaoka, Tsukuba, Ibaraki 305-8585 Japan

<sup>6</sup>Department of Computer Science, Graduate School of Information Science and Engineering, Tokyo Institute of Technology, Meguro-ku, Tokyo 152-8550, Japan

<sup>7</sup>Department of Biomedical Chemistry, Graduate School of Medicine, The University of Tokyo, Bunkyo-ku, Tokyo, 113-0033, Japan

<sup>8</sup>School of Tropical Medicine and Global Health, Nagasaki University, Sakamoto,

Nagasaki, 852–8523, Japan

<sup>9</sup>Present affiliation: Catalyst Inc., Risona Kudan Building 5F KS Floor, 1–5–6 Kudan Minami, Chiyoda-ku, Tokyo 102-0074 Japan

Correspondence to [sekijima@c.titech.ac.jp](mailto:sekijima@c.titech.ac.jp)

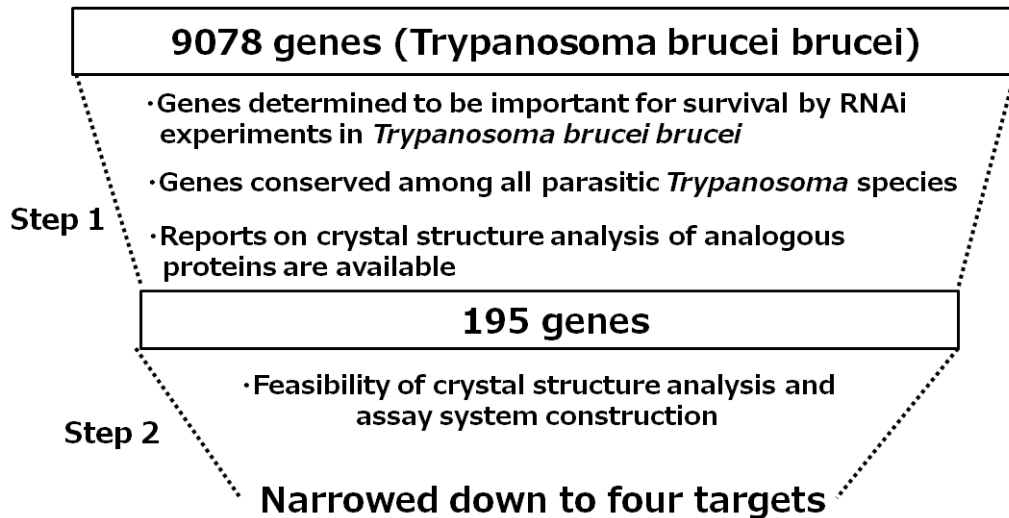

Supplementary Figure 1. Search method for target proteins using iNTRODB.

a

```
>Tb09.v1.0380 |||spermidine synthase, putative|Trypanosoma
brucei|chr 9|||Manual
Length = 298

Score = 431 bits (1107), Expect = e-154, Method: Compositional matrix adjust.
Identities = 199/296 (67%), Positives = 239/296 (80%), Gaps = 1/296 (0%)

Query: 1  MPGSELISGGWFREENDQWPGQAMSLRVEKVLVDAPTKFQHLTIFESDPKGPWGTVMALD 60
          MPG L++ GWFREEN QWPGQAMS +VE+VL+D PTKFQHL+IFE+DPKGPWGTVM LD
Sbjct: 1  MPGPGLLADGWFREENGQWPGQAMSFKVEEVLHDTPTKQHLTIFETDPKGPWGTVMTLD 60

Query: 61  GCIQVTDYDEFVYHEVLGHTSLCSHPKXXXXXXXXXXXXXXXXXXXXHGTVEHCDLVDID 120
          GCIQ+TD+DEFVYHE+L HT LC+HP P HGTV+ C LVDID
Sbjct: 61  GCIQLTDFDEFVYHEMLSHTPCAHPDVPDVLIIIGGGGGVMREVLRHGTVKRCVLDID 120

Query: 121  GEVMEQSKQHFQISRSLDPRATVRVDDGLAFVRQTPDNTYDVIIDTTDPAGPASELF 180
          G+V+E SK++FPQIS +DPRA VRV DG+AFVR+ ++DVIIDTTDP GPA+ELF
Sbjct: 121  GDVIEASKKYFPQISSGFSRPRADVRVGDGVAFAVREAASESFDVVIIDTTDPDGPAAELF 180

Query: 181  GEAFYKHLRILKPDGICCNQGESIWLNLELIEKMSRFIR-ETGFASVQYALMHVPTYPC 239
          GE FY+ VLRLKP GICCNQGES+WLN LIE M+ FI+ + GFASV+YA+++ PTYPC
Sbjct: 181  GEKFRYDVLRLKPRGICCNQGESVWLNRLIEGMADFIKNKVGFAVYKAMIYPTYPC 240

Query: 240  GSIGTLCISKAGVDVTKPLRPVEDMPFAKDLKYYDSEMHKASFALPRFARHINNS 295
          GSIG+LISCK AGVDVT+P+RPVE MPFA +LKYYS++HKA+F LPRFARH+N +
Sbjct: 241  GSIGSLICSKVAGVDVTQVPRVPESEMPFAGELKYYSDVHKAFAVLPFRFARHLNQN 296
```

b

```
>LmjF.04.0580 | organism=Leishmania_major_strain_Friedlin |
product=spermidine synthase |
location=LmjF.04:239178-240080(-) | length=300
Length = 300

Score = 380 bits (977), Expect = e-134, Method: Compositional matrix adjust.
Identities = 180/299 (60%), Positives = 218/299 (72%), Gaps = 6/299 (2%)

Query: 1  MPGSELISGGWFREENDQWPGQAMSLRVEKVLVDAPTKFQHLTIFESDPKGPWGTVMALD 60
          MPG L+ GWFREE+ WPGQA L+VEKVLVD PT+FQHLT+FESDP GPWGTVM LD
Sbjct: 1  MPGPGLLPDGWFREESTMWPQQAQGLKVEKVLVDQPTFQHLTVFESDPSPGWGTVMTLD 60

Query: 61  GCIQVTDYDEFVYHEVLGHTSLCSHPKXXXXXXXXXXXXXXXXXXXXH-----GTVEHCD 115
          G IQ+TDYDEFVYHE+L + SL H KP H G V+ +
Sbjct: 61  GAIQLTDYDEFVYHEMLANLSLACHHKPERVLVIGGGGGVVREVLRHKSEKDGVVQVSVE 120

Query: 116  LVDIDGVEVMEQSKQHFQISRSLDPRATVRVDDGLAFVRQTPDNTYDVIIDTTDPAGP 175
          LVDIDG VM+QSK+HFPQ++ +P T V DG AFVR PD+ YDV+IIDTTDP GP
Sbjct: 121  LVDIDGAVMQSKKHFPQVACGFANPCVTATVGDGAAFVRNVPDVSVDVVIIDTTDPKGP 180

Query: 176  ASELFGAEFYKHLRILKPDGICCNQGESIWLNLELIEKMSRFI-RETGFASVQYALMHV 234
          ASELFG FY +VLRIL+P G+ CNQGES+WL+ LIEKM F+ ++ GFA+V+YA++++
Sbjct: 181  ASELFGADFYTNVLRILRPGGVVNCQGESVWLRPLIEKMMGFLKKDIFATVKYAMIYI 240

Query: 235  PTYPCGSIGTLCISKAGVDVTKPLRPVEDMPFAKDLKYYDSEMHKASFALPRFARHIN 293
          PTYPCGSIGTL+C+K A DVT P+RPVE + FA LKYY S+MHKA+F LPRFA H+N
Sbjct: 241  PTYPCGSIGTLVCAKSADTDVTPMRPVESLGFADQLKYYSSDMHKAFAVLPFRFAAHLN 299
```

c

```
>gi|63253298|ref|NP_003123.2| spermidine synthase [Homo sapiens]
Length = 302

Score = 224 bits (571), Expect = 5e-72, Method: Compositional matrix adjust.
Identities = 114/293 (38%), Positives = 172/293 (58%), Gaps = 6/293 (2%)

Query: 3  GSELISGGWFREENDQWPGQAMSLRVEKVLVDAPTKFQHLTIFESDPKGPWGTVMALDGC 62
          G I GWFRE WPGQA+SL+VE++L+ +++Q + +F S +G V+ LDG
Sbjct: 12  GPAAIREGWFRCTSLWPGQALSLQVEQLLHRRSRVQDILVFRSKT---YGNVLLVDGV 68

Query: 63  IQVTDYDEFVYHEVLGHTSLCSHPKXXXXXXXXXXXXXXXXXXXXHGTVEHCDLVDIDG 122
          IQ T+ DEF Y E++ + LCSHP P H +VE +ID +
Sbjct: 69  IQCTERDEFSYQEMIANLPLCSHPNPKVLIIIGGGGGVLEVVKHPSVESVQCEIDED 128

Query: 123  VMEQSKQHFQISRSLDPRATVRVDDGLAFVRQTPDNTYDVIIDTTDPAGPASELFGE 182
          V++ SK+ P ++ + + T+ V DG F++Q D +DV+I D++DP GPA LF E
Sbjct: 129  VIQVSKKFLPGMAIGYSSSKLTLHVGDGFEFMKQNQD-AFDVVIIDSSDPMGPAESLFKE 187

Query: 183  AFYKHLRILKPDGICCNQGESIWLNLELIEKMSRFIRETGFASVQYALMHVPTYPCGSI 242
          ++Y+ + LK DG+ C QGE WL+L+LI++M +F + F V YA +PTYP G I
Sbjct: 188  SYYQLMKTALKEDGLCCQGEQWLHLDLIKEMRQFCQSL-FPVVAYAYCTIPTYPGSI 246

Query: 243  GTLCSKAGVDVTKPLRPVEDMPFAK-DLKYYDSEMHKASFALPRFARHINN 294
          G ++CSK + +P++P+ A+ LKYY+S+++H+A+F LP FAR N
Sbjct: 247  GFMLCSKNPSTNFQEPVQPLTQQQVAQMQLKYYNSDVHRAAFVLPFARKALN 299
```

**Supplementary Figure 2.** Aligned protein sequence of spermidine synthase between *Trypanosoma cruzi* (CL Brener strain) and A: *T. brucei*, B: *Leishmania major*, C: *Homo sapiens*. Aligned sequences were obtained from iNTRODB.

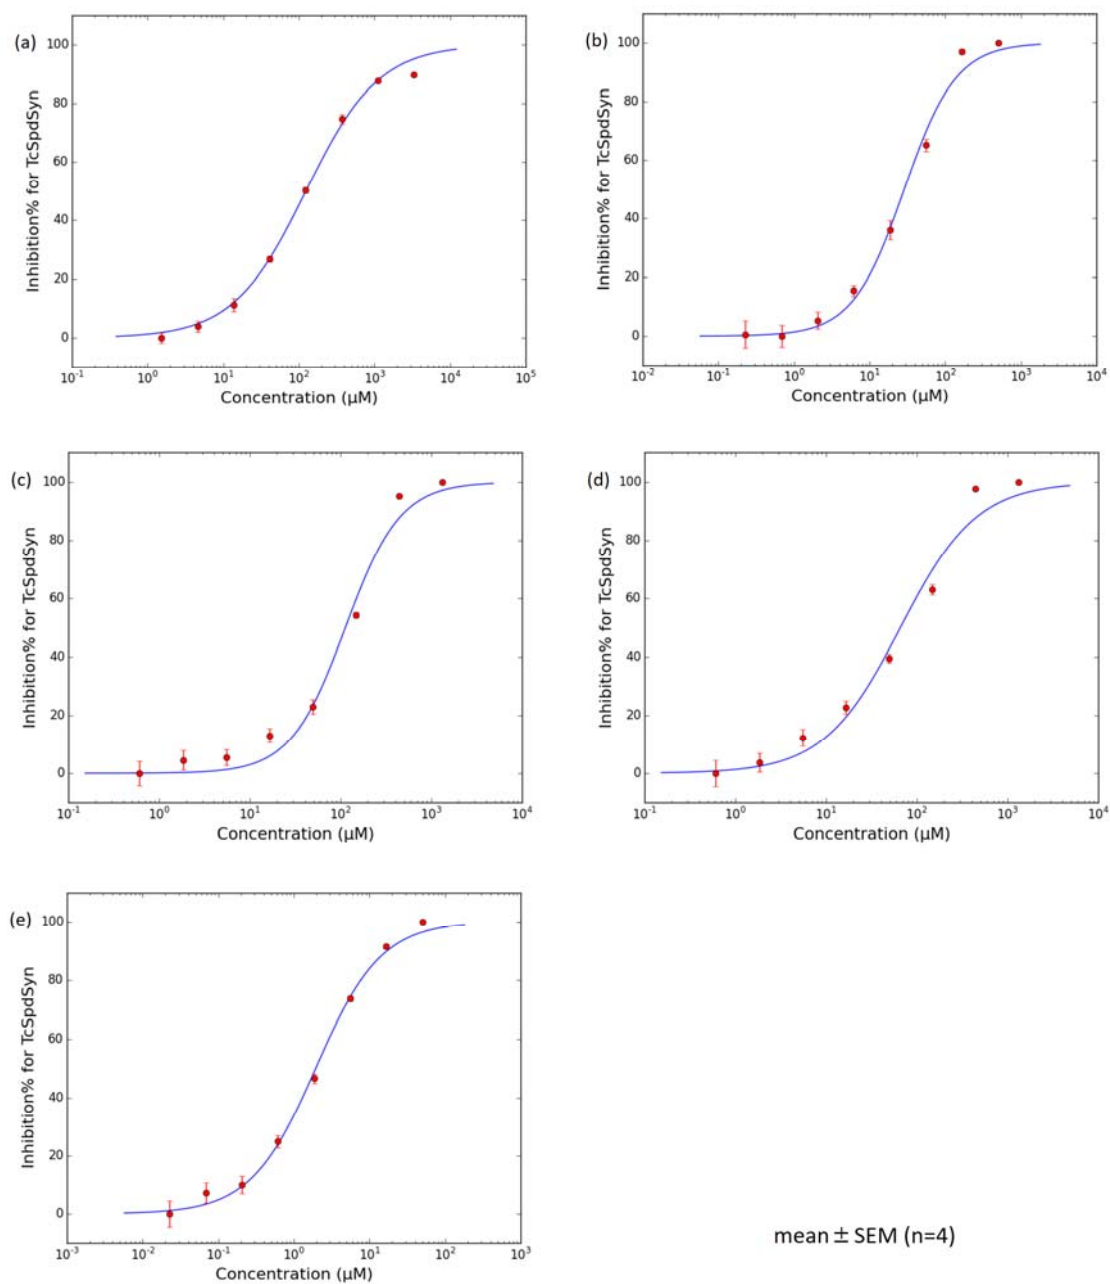

**Supplementary Figure 3.** The fitting curve for IC<sub>50</sub> calculation of the compounds on Table 1 (Compounds 1, 2, 3, 4, and 4MCHA correspond to (a), (b), (c), (d) and (e), respectively). The vertical line and horizontal axis's represent inhibition% for TcSpdSyn and compound concentration. The closed circles show the inhibition% measured at each dose. The error bars indicate the standard error of the inhibition% measured at each dose. For curve fitting, the following four parameter logistic (4PL) model<sup>1</sup> is used. The parameter values of the equation of each compound are shown in Supplementary Table 3.

$$y = \min + \frac{\max - \min}{1 + 10^{(\text{Hill}(\text{Log}_{10}(X_{50}) - x) )}}$$

**Supplementary Table 1.** Supplier ID and Namiki ID of the active compounds by *in vitro* assay listed in Table 1.

| <b>Compound ID</b> | <b>Supplier Name</b> | <b>Supplier ID</b> | <b>Namiki ID</b> |
|--------------------|----------------------|--------------------|------------------|
| 1                  | Bepharm              | B21234             | NS-00034421      |
| 2                  | Vitas-M              | STK107845          | NS-00694195      |
| 3                  | Pharmeks             | P2001S-338404      | NS-03964486      |
| 4                  | Enamine              | EN300-115921       | NS-00027256      |

**Supplementary Table 2.** Supplier ID and Namiki ID of inactive compounds by *in vitro* assay.

| <b>Namiki ID</b> | <b>Supplier ID</b> | <b>Supplier Name</b> |
|------------------|--------------------|----------------------|
| NS-01988866      | IBS-L0127228       | Alinda               |
| NS-04133406      | AC-20091           | APIChem              |
| NS-00084264      | OR13234            | Apollo               |
| NS-08456239      | ADM 12409198       | Asinex               |
| NS-09711136      | ART 09584052       | Asinex               |
| NS-09686125      | ART 12883679       | Asinex               |
| NS-09723909      | ART 15417152       | Asinex               |
| NS-00738895      | ASN 03204271       | Asinex               |
| NS-00553327      | BAS 00112672       | Asinex               |
| NS-00568801      | BAS 00132206       | Asinex               |
| NS-00557872      | BAS 00162617       | Asinex               |
| NS-00375233      | BAS 00485302       | Asinex               |
| NS-00456710      | BAS 01052336       | Asinex               |
| NS-00683031      | BAS 03673624       | Asinex               |
| NS-06088261      | B10057             | Bepharm              |
| NS-01984066      | B110683            | Bepharm              |
| NS-01984075      | B11935             | Bepharm              |
| NS-00242318      | B126389            | Bepharm              |
| NS-00216529      | B185962            | Bepharm              |
| NS-00242327      | B19373             | Bepharm              |
| NS-08726051      | B225643            | Bepharm              |

|             |              |                  |
|-------------|--------------|------------------|
| NS-00502269 | B226825      | Bepharm          |
| NS-00084817 | B237070      | Bepharm          |
| NS-00520067 | B34480       | Bepharm          |
| NS-01447165 | B53509       | Bepharm          |
| NS-00038373 | B55162       | Bepharm          |
| NS-00027436 | B6027        | Bepharm          |
| NS-00026629 | B7480        | Bepharm          |
| NS-00086239 | B7776        | Bepharm          |
| NS-00106974 | B83970       | Bepharm          |
| NS-00240797 | B86318       | Bepharm          |
| NS-00042374 | B94867       | Bepharm          |
| NS-04691291 | 2F-088       | Bionet           |
| NS-00897223 | 1C-097       | Bionet(Fragment) |
| NS-01971130 | IN-0425      | CombiBlocks      |
| NS-00045707 | QA-1027      | CombiBlocks      |
| NS-00210693 | QA-3805      | CombiBlocks      |
| NS-02726054 | QC-6510      | CombiBlocks      |
| NS-03104067 | QE-9891      | CombiBlocks      |
| NS-00025515 | QY-1767      | CombiBlocks      |
| NS-00096534 | SS-4524      | CombiBlocks      |
| NS-00422542 | EN300-112596 | Enamine          |
| NS-03042830 | EN300-113084 | Enamine          |
| NS-00024529 | EN300-122589 | Enamine          |
| NS-10494236 | EN300-127485 | Enamine          |
| NS-00135682 | EN300-13617  | Enamine          |
| NS-00021451 | EN300-13896  | Enamine          |
| NS-03065527 | EN300-139143 | Enamine          |
| NS-00025508 | EN300-15718  | Enamine          |
| NS-00044917 | EN300-160189 | Enamine          |
| NS-00034115 | EN300-175002 | Enamine          |
| NS-00025550 | EN300-18624  | Enamine          |
| NS-00096048 | EN300-20404  | Enamine          |

|             |              |         |
|-------------|--------------|---------|
| NS-00095940 | EN300-215558 | Enamine |
| NS-00044424 | EN300-31275  | Enamine |
| NS-05620599 | EN300-33359  | Enamine |
| NS-00208253 | EN300-34367  | Enamine |
| NS-00040634 | EN300-36560  | Enamine |
| NS-00039012 | EN300-38966  | Enamine |
| NS-00083514 | EN300-56240  | Enamine |
| NS-00127946 | EN300-61777  | Enamine |
| NS-07300875 | EN300-64804  | Enamine |
| NS-04286829 | EN300-68454  | Enamine |
| NS-01820579 | EN300-69071  | Enamine |
| NS-05682291 | EN300-82463  | Enamine |
| NS-00000321 | Z104507050   | Enamine |
| NS-09460347 | Z1123821842  | Enamine |
| NS-09851924 | Z1130245470  | Enamine |
| NS-05677846 | Z1198335676  | Enamine |
| NS-02654486 | Z1255356155  | Enamine |
| NS-10120169 | Z169504308   | Enamine |
| NS-03448452 | Z237732596   | Enamine |
| NS-00652324 | Z238921002   | Enamine |
| NS-01767178 | Z31375831    | Enamine |
| NS-01639043 | Z31380603    | Enamine |
| NS-02048933 | Z370706740   | Enamine |
| NS-08389397 | Z384973502   | Enamine |
| NS-00036560 | Z415740552   | Enamine |
| NS-04286824 | Z432090862   | Enamine |
| NS-08436212 | Z445132884   | Enamine |
| NS-01248894 | Z45415551    | Enamine |
| NS-00250557 | Z56780034    | Enamine |
| NS-06342424 | Z600584194   | Enamine |
| NS-07238675 | Z649635088   | Enamine |
| NS-00206553 | Z90660992    | Enamine |



|             |             |                     |
|-------------|-------------|---------------------|
| NS-00029324 | Z944939438  | Enamine             |
| NS-03050150 | 12R0026     | JWPharmlab          |
| NS-03052261 | 20R0212     | JWPharmlab          |
| NS-01958208 | LT00007983  | Labotest            |
| NS-05078226 | LT00030844  | Labotest            |
| NS-01963106 | LT00050116  | Labotest            |
| NS-01971832 | LT00118654  | Labotest            |
| NS-01976901 | LT00154482  | Labotest            |
| NS-01981402 | LT-IV X 478 | Labotest            |
| NS-02049344 | F1278-0327  | LifeChemicals       |
| NS-04370463 | F3366-5220  | LifeChemicals       |
| NS-00021546 | 9899        | Matrix              |
| NS-00024028 | 10868       | Matrix              |
| NS-00022663 | 18523       | Matrix              |
| NS-03120259 | 21508       | Matrix              |
| NS-00096533 | 33847       | Matrix              |
| NS-06850867 | 41077       | Matrix              |
| NS-00375649 | BTB12148    | Maybridge           |
| NS-00625817 | CD07798     | Maybridge           |
| NS-00041234 | KM01833     | Maybridge           |
| NS-02168278 | KM09877     | Maybridge           |
| NS-02171378 | RDP00177    | Maybridge           |
| NS-02172479 | RF00498     | Maybridge           |
| NS-02172984 | RF02876     | Maybridge           |
| NS-00042069 | RJC00810    | Maybridge           |
| NS-02181735 | SEW03911    | Maybridge           |
| NS-00101613 | SPB07361    | Maybridge           |
| NS-04428093 | CC75719     | Maybridge(Fragment) |
| NS-02142145 | 13321       | MolMall             |
| NS-02142989 | 15379       | MolMall             |
| NS-02143192 | 15633       | MolMall             |
| NS-02143187 | 102931      | MolMall             |

|             |                 |                    |
|-------------|-----------------|--------------------|
| NS-04364531 | 1049802         | OTAVA              |
| NS-05686762 | 1192847         | OTAVA              |
| NS-04409108 | 7020692941      | OTAVA              |
| NS-00601376 | P2000S-19366    | Pharmeks           |
| NS-00616224 | P2000S-23760    | Pharmeks           |
| NS-00599907 | P2000S-26470    | Pharmeks           |
| NS-00629207 | P2000S-27173    | Pharmeks           |
| NS-02281209 | P2001S-052746   | Pharmeks           |
| NS-00638619 | P2001S-063604   | Pharmeks           |
| NS-02293313 | P2001S-113312   | Pharmeks           |
| NS-01448839 | P2001S-160661   | Pharmeks           |
| NS-00694795 | P2001S-168762   | Pharmeks           |
| NS-02320185 | P2001S-186681   | Pharmeks           |
| NS-02320927 | P2001S-187781   | Pharmeks           |
| NS-00881867 | P2001S-238236   | Pharmeks           |
| NS-01061606 | P2001S-264815   | Pharmeks           |
| NS-02234815 | P2000N-10331    | Pharmeks(Natural)  |
| NS-02235337 | P2000N-11786    | Pharmeks(Natural)  |
| NS-02250802 | P2000N-37233    | Pharmeks(Natural)  |
| NS-02503810 | OSSK_485183     | Princeton          |
| NS-09668660 | OSSL_477426     | Princeton          |
| NS-01484266 | OSSL_822359     | Princeton          |
| NS-02648504 | PH012669        | SALOR              |
| NS-00475129 | R295736         | SALOR              |
| NS-02628888 | R436860         | SALOR              |
| NS-02642429 | S136107         | SALOR              |
| NS-04101213 | S914789         | SALOR              |
| NS-00242430 | 1-0026          | ScientificExchange |
| NS-03323092 | Z-007027        | ScientificExchange |
| NS-02719860 | Z-025192        | ScientificExchange |
| NS-02683904 | AJ-333/15478078 | SPECS              |
| NS-02721148 | ST002006        | TimTec             |

|             |             |          |
|-------------|-------------|----------|
| NS-00690438 | STK016799   | Vitas-M  |
| NS-02525824 | STK163122   | Vitas-M  |
| NS-02596772 | STK220715   | Vitas-M  |
| NS-03444130 | STK280472   | Vitas-M  |
| NS-05176117 | STK298937   | Vitas-M  |
| NS-05615458 | STK338050   | Vitas-M  |
| NS-01447216 | STK368001   | Vitas-M  |
| NS-03667421 | STK387017   | Vitas-M  |
| NS-06400628 | STK521785   | Vitas-M  |
| NS-00472084 | STK734312   | Vitas-M  |
| NS-00873275 | STL032034   | Vitas-M  |
| NS-01963305 | STL033042   | Vitas-M  |
| NS-00671753 | STL327502   | Vitas-M  |
| NS-00469312 | UZI/2599943 | Zelinsky |
| NS-00505849 | UZI/2625541 | Zelinsky |
| NS-02729450 | UZI/2647801 | Zelinsky |
| NS-03081113 | UZI/2655098 | Zelinsky |
| NS-00354396 | UZI/6095081 | Zelinsky |
| NS-01451287 | UZI/6188274 | Zelinsky |
| NS-00464302 | UZI/7131862 | Zelinsky |
| NS-01036208 | UZI/8190366 | Zelinsky |
| NS-00240683 | UZI/9019794 | Zelinsky |
| NS-10533350 | UZI/9062663 | Zelinsky |

Supplementary Table 3. The parameter values of the equation used for the curve fitting.

| Compound ID | min  | Max    | Hill | LoggedX50 |
|-------------|------|--------|------|-----------|
| 1           | 0.00 | 100.00 | 0.90 | 2.09      |
| 2           | 0.00 | 100.00 | 1.27 | 1.46      |
| 3           | 0.00 | 100.00 | 1.44 | 2.05      |
| 4           | 0.00 | 100.00 | 1.03 | 1.82      |
| 4MCHA       | 0.00 | 100.00 | 1.01 | 0.29      |

## References

1. Fomenko, I, Durst, M & Balaban, D. Robust regression for high throughput drug screening. *Comput Meth Programs Biomed* **82**, 31-37 (2006).
